# Supplementary material for: Computer-Delivered and Web-Based Interventions to Improve Depression, Anxiety, and Psychological Well-Being of University Students: A Systematic Review and Meta-Analysis
Source: PubMed Central journal article supplement (PMC4051748; doi:10.2196/jmir.3142), 2014-05-16
Supplement: jmir_v16i5e130_app1.pdf [file jmir_v16i5e130_app1.pdf]

**Multimedia Appendix 1.** Search terms used in online databases (except publisher websites and Google Scholar). Four separate search strings were performed in each database.

| <b>Search string</b> | <b>Type of intervention</b>                                                                                                                                                                                                                 |     | <b>Target change of intervention</b>                                                                                                                                                                                                                                                               |     | <b>Sample</b>                                                                                                                               |
|----------------------|---------------------------------------------------------------------------------------------------------------------------------------------------------------------------------------------------------------------------------------------|-----|----------------------------------------------------------------------------------------------------------------------------------------------------------------------------------------------------------------------------------------------------------------------------------------------------|-----|---------------------------------------------------------------------------------------------------------------------------------------------|
| <i>Search 1</i>      | "online intervention" OR<br>"internet intervention" OR<br>"internet based intervention"<br>OR "web intervention" OR "web<br>based intervention" OR "online<br>treatment" OR "computer<br>based interventions" OR<br>"computer intervention" | AND | "behaviour change" OR<br>"behavior change" OR<br>"behaviour modification"<br>OR "behavior modification"<br>OR "health behaviour" OR<br>"health behavior"                                                                                                                                           | AND | "undergraduate student" OR<br>"college student" OR "university<br>student" OR "student" OR<br>"higher education" OR "tertiary<br>education" |
| <i>Search 2</i>      | "intervention" AND ("online"<br>OR "web" OR "computer" OR<br>"internet")                                                                                                                                                                    | AND | "behaviour change" OR<br>"behavior change" OR<br>"behaviour modification"<br>OR "behavior modification"<br>OR "health behaviour" OR<br>"health behavior"                                                                                                                                           | AND | "undergraduate student" OR<br>"college student" OR "university<br>student" OR "student" OR<br>"higher education" OR "tertiary<br>education" |
| <i>Search 3</i>      | "online intervention" OR<br>"internet intervention" OR<br>"internet based intervention"<br>OR "web intervention" OR "web<br>based intervention" OR "online<br>treatment" OR "computer<br>based interventions" OR<br>"computer intervention" | AND | "sexual health" OR<br>"condom" OR "HIV" OR<br>"alcohol" OR "drug" OR<br>"substance use" OR<br>"cannabis" OR "smoking"<br>OR "smoking cessation"<br>OR "physical activity" OR<br>"exercise" OR "obesity"<br>OR "weight" OR "eating"                                                                 | AND | "undergraduate student" OR<br>"college student" OR "university<br>student" OR "student" OR<br>"higher education" OR "tertiary<br>education" |
| <i>Search 4</i>      | "online intervention" OR<br>"internet intervention" OR<br>"internet based intervention"<br>OR "web intervention" OR "web<br>based intervention" OR "online<br>treatment" OR "computer<br>based interventions" OR<br>"computer intervention" | AND | "mental health" OR<br>"depression" OR<br>"depressive symptoms"<br>OR "anxiety" OR "affective<br>disorder" OR "bipolar" OR<br>"psychosis" OR "social<br>anxiety" OR "exam anxiety"<br>OR "stress" OR<br>"perfectionism" OR<br>"personality" OR<br>"insomnia" OR "sleep" OR<br>"eating disorders" OR | AND | "undergraduate student" OR<br>"college student" OR "university<br>student" OR "student" OR<br>"higher education" OR "tertiary<br>education" |

---

"anorexia" OR "bulimia"  
OR "eating problems" OR  
"addiction" OR "gambling"  
OR "self harm" OR "self-  
harm" OR "suicide" OR  
"mental health difficulties"

---

**Databases searched:**

Science Direct

CINAHL

ASSIA

SCOPUS

Cochrane Central Library of Controlled Trials (CENTRAL)

EMBASE

PubMed

Web of Science

MedLine

Google Scholar (reduced search terms used)
