# Supplementary material for: Computer-Delivered and Web-Based Interventions to Improve Depression, Anxiety, and Psychological Well-Being of University Students: A Systematic Review and Meta-Analysis
Source: PubMed Central journal article supplement (PMC4051748; doi:10.2196/jmir.3142), 2014-05-16
Supplement: jmir_v16i5e130_app4.pdf [file jmir_v16i5e130_app4.pdf]

**Multimedia Appendix 3.** Summary of web-based and computer-delivered interventions to improve depression, anxiety, psychological distress and stress conducted in higher education populations included in the present review.

| <b>Study</b>                | <b>Design, arms (N per arm), N, location</b>                                       | <b>Sample demographics and inclusion criteria</b>                                                                                                                   | <b>Intervention</b>                                                                                               | <b>Length/dosage</b>                                                                                                                     | <b>Location</b>                 | <b>Outcome measures</b>                                          | <b>Analysis</b> |
|-----------------------------|------------------------------------------------------------------------------------|---------------------------------------------------------------------------------------------------------------------------------------------------------------------|-------------------------------------------------------------------------------------------------------------------|------------------------------------------------------------------------------------------------------------------------------------------|---------------------------------|------------------------------------------------------------------|-----------------|
| Arpin-Cribbie et al 2012    | RCT<br>3 arms: Intervention (29), CI (26), WLC (25)<br>N=77<br>One HEI, Canada     | Selective/indicated<br><br>Undergraduate psychology students<br>70% female, M age 20.1yrs<br>High levels of perfectionism (PCI)                                     | Internet-delivered CBT for perfectionism<br><br>Self-administered                                                 | 13 modules over 10 weeks; suggested order for working through intervention (not mandatory)                                               | Own location                    | CES-D<br>ATQ<br>BAI<br>ASI<br>PSS<br>MPS-F – CM<br>MPS-HF<br>PCI | Completers      |
| Botella et al 2010          | RCT<br>3 arms:<br>Intervention (62), CI (36), WLC (29)<br>N=127<br>Two HEIs, Spain | Treatment<br><br>Undergraduate and postgraduate students<br>61 females, M age 24.4yrs (completers only)<br>Met DSM-IV diagnostic criteria for social anxiety/phobia | "Talk to Me":<br>website-based CBT for fear of public speaking<br><br>Self-administered                           | Available over 8 weeks, participants exposed to anxious situation through use of embedded videos                                         | Own location                    | SAD<br>BDI<br>BFNE<br>FPSQ<br>SSPS<br>MS                         | ITT             |
| Braithwaite & Fincham 2007* | RCT<br>3 arms: Intervention, CI and AC<br>N=91<br>One HEI, USA                     | Universal<br><br>Undergraduate psychology students<br>59% female<br>In romantic relationship of ≥4 months duration                                                  | <i>ePREP</i> : relationship functioning intervention<br>Based on CBT<br>Delivered via computer<br><br>Semi-guided | 1-hour computer session followed by weekly standardised emails over 8 weeks<br>□<br>Participants had paper copy of computer intervention | Researcher-monitored laboratory | BAI<br>BDI<br>PANAS<br>CTS-2<br>PRQC<br>CPQ-CC<br>Trust scale    | Uncertain       |
| Braithwaite & Fincham 2009  | RCT<br>2 arms: Intervention (38), AC (39)<br>N=77<br>One HEI, USA                  | Universal<br><br>Undergraduate psychology students<br>71% female, M age 19.4yrs<br>In romantic relationship of ≥4 months duration                                   | <i>ePREP</i> : relationship functioning intervention (same as Braithwaite & Fincham 2007)<br><br>Semi-guided      | Same as Braithwaite & Fincham (2007)                                                                                                     | Researcher-monitored laboratory | BAI<br>BDI<br>CTS-2<br>CSI                                       | ITT             |

|                         |                                                                                            |                                                                                                                                                                         |                                                                                                                                                                 |                                                                                                                                                                                                                                                      |                                 |                               |            |
|-------------------------|--------------------------------------------------------------------------------------------|-------------------------------------------------------------------------------------------------------------------------------------------------------------------------|-----------------------------------------------------------------------------------------------------------------------------------------------------------------|------------------------------------------------------------------------------------------------------------------------------------------------------------------------------------------------------------------------------------------------------|---------------------------------|-------------------------------|------------|
| Cavanagh et al 2013     | RCT<br>2 arms:<br>Intervention (54), WLC (50)<br>N=104<br>One HEI, UK                      | Universal<br>Undergraduate and postgraduate students<br>92 females, M age 24.7yrs                                                                                       | " <i>Learning Mindfulness Online</i> ":<br>intranet-based website designed to teach Mindfulness<br><br>Semi-guided                                              | Available over 2 weeks, 4 standardised reminder emails sent over period                                                                                                                                                                              | Own location                    | PSS<br>PHQ-4<br>FFMQ          | ITT        |
| Chiauzzi et al 2008*    | RCT<br>3 arms: Intervention (80), AC (80), NTC (80)<br>N=77<br>Six HEIs, USA               | Selective/indicated<br><br>Undergraduate students<br>123 females<br>18-24yrs, experiencing elevated perceived stress (PSS)                                              | <i>My StudentBody-Stress</i> : psycho-educational student-tailored website for stress management - possibly based on cognitive therapy<br><br>Self-administered | ≥20 minutes at least four times over two week period                                                                                                                                                                                                 | Own location                    | PSS<br>HPLP-II<br>CAS         | Uncertain  |
| Cukrowicz & Joiner 2007 | RCT<br>2 arms: Intervention (81), AC (71)<br>N=238; N=152 analysed<br>One HEI, USA         | Selective/indicated<br><br>Undergraduate psychology students<br>169 female, M age 19.2yrs<br>Minimal/mild symptoms of depression and anxiety (BDI, BAI)                 | <i>CBASP</i> : psycho-educational and CBT for depression and anxiety<br><br>Delivered via computer<br><br>Semi-guided                                           | 2-hour computer session followed by weekly standardised emails over 8 weeks<br><br>Eight worksheets based on Situational Analysis - participants to work through these when encounter stressful situation.                                           | Researcher-monitored laboratory | BAI<br>BDI<br>PANAS<br>STAI-S | Completers |
| Day et al 2013          | RCT<br>2 arms:<br>Intervention (33), WLC (33)<br>N=66; N=66 analysed<br>Three HEIs, Canada | Selective/indicated<br><br>Undergraduate and postgraduate students<br>59 females, M age 23.55yrs<br>Mild/moderate symptoms of depression or anxiety or stress (DASS-21) | " <i>Feeling Better</i> ",<br>website-based CBT program<br><br>Semi-guided                                                                                      | 5 core modules, plus 6 optional modules.<br>Completed in own time over 6 week period.<br><br>Participants received weekly email or telephone non-therapeutic support from a program coach - this was to monitor and support completing intervention. | Own location                    | DASS-21                       | ITT        |

|                     |                                                                                   |                                                                                                                                                                           |                                                                                                                                                           |                                                                                                                                                                                         |                                 |                                                            |                                                   |
|---------------------|-----------------------------------------------------------------------------------|---------------------------------------------------------------------------------------------------------------------------------------------------------------------------|-----------------------------------------------------------------------------------------------------------------------------------------------------------|-----------------------------------------------------------------------------------------------------------------------------------------------------------------------------------------|---------------------------------|------------------------------------------------------------|---------------------------------------------------|
| Ellis et al 2011    | RCT<br>3 arms: Intervention (13), CI (13), NTC (13)<br>N=39<br>One HEI, Australia | Selective/indicated<br><br>Undergraduate psychology and health sciences students<br>77% female, M age 19.6 yrs<br>Low-to-moderate levels of psychological distress (K-10) | <i>MoodGym</i> : internet-delivered CBT program<br><br>Semi-guided                                                                                        | Five modules accessed during three 60-minute sessions over three weeks                                                                                                                  | Researcher-monitored laboratory | DASS-21<br>ATQ<br>K10<br>CBT-Lit<br>OSSS                   | ITT                                               |
| Kanekar et al 2010* | RCT<br>2 arms: Intervention, AC<br>N=60; 39 analysed<br>One HEI, USA              | Universal<br><br>Postgraduate students<br>34 male, M age 24.6yrs<br>Full-time international students of Indian nationality                                                | Internet-delivered intervention: sessions focused on education about social support, hardiness and acculturation<br><br>Semi-guided                       | Three sessions completed over eight weeks                                                                                                                                               | Own location                    | K-10 (analysed as K-6)*<br>ISEL<br>AIRS<br>Hardiness scale | Completers                                        |
| Kenardy et al 2003  | RCT<br>2 arms: Intervention (43), WLC (40)<br>N=83<br>One HEI, Australia          | Selective/indicated<br><br>Undergraduate psychology students<br>65 females, M age 19.9yrs<br>Elevated anxiety sensitivity levels (ASI)                                    | <i>Online Anxiety Prevention Program</i> : psycho-educational and CBT-based internet-delivered intervention<br><br>Self-administered                      | Six sessions over six weeks<br><br>Recommended to spend 5-7 days working on each session                                                                                                | Own location                    | ASI<br>CES-D<br>BSQ<br>CCQ-M<br>ACQ                        | Completers                                        |
| Lintvedt et al 2011 | RCT<br>2 arms: Intervention (81), WLC (82)<br>N=163<br>Two HEIs, Norway           | Selective/indicated<br><br>Undergraduate and postgraduate students<br>125 females, M age 28.2yrs<br>Elevated levels of psychological distress (K-10)                      | <i>MoodGym</i> : internet-delivered CBT program +<br><i>BluePages</i> : informational website about depression<br><br>Unsure about level of human support | Five <i>MoodGym</i> modules made available on sequential weekly basis. Trial period was eight weeks. Participants given manuals detailing which parts of intervention to access weekly. | Own location                    | CES-D<br>ATQ<br>TDL                                        | ITT<br>(Completers' analysis reported separately) |

|                   |                                                                                                 |                                                                                                                                                                          |                                                                                                                                                                                                                  |                                                                                          |                                 |                                                                                                                                                                            |            |
|-------------------|-------------------------------------------------------------------------------------------------|--------------------------------------------------------------------------------------------------------------------------------------------------------------------------|------------------------------------------------------------------------------------------------------------------------------------------------------------------------------------------------------------------|------------------------------------------------------------------------------------------|---------------------------------|----------------------------------------------------------------------------------------------------------------------------------------------------------------------------|------------|
| Orbach et al 2007 | RCT<br>2 arms: Intervention (47), AC (43)<br>N=90<br>One HEI, UK                                | Selective/indicated<br><br>Undergraduate and postgraduate students<br>58 female, M age 24.2yrs<br>Not receiving treatment for test anxiety<br>Self-reported text anxiety | Internet delivered intervention for test anxiety; based on CBT<br><br>Self-administered                                                                                                                          | Six modules; suggested dosage 30 minutes per week (but not mandatory)                    | Own location                    | TAI<br>AHQ<br>EPSI<br>GSES<br>STAI-S                                                                                                                                       | Completers |
| Radhu et al 2012  | RCT<br>2 arms: Intervention (28), WLC (30)<br>N=58; 47 analysed<br>One HEI, Canada              | Selective/indicated<br><br>Undergraduate psychology students<br>34 female, M age 22.6yrs<br>High levels of perfectionism (PCI)                                           | Internet-delivered CBT for perfectionism (same as Arpin-Cribbie 2012)<br><br>Self-administered                                                                                                                   | 13 modules over 12 weeks; could access anytime                                           | Own location                    | CES-D<br>ATQ<br>BAI<br>ASI<br>PSS<br>MPS-F<br>MPS-HF<br>PCI<br>APSR                                                                                                        | Completers |
| Rose et al 2013   | RCT<br>2 arms:<br>Intervention (34), AC (32)<br>N=66; 59 analysed<br>One HEI, USA               | Selective/indicated<br><br>Postgraduate students, mostly from Management and Law courses<br>33 females, M age 27.3yrs<br>Elevated stress (PSS)                           | <i>SMART-OP</i> : CBT-based stress management and resilience training program.<br>Delivered via computer program<br><br>6 sessions over 6 weeks + homework between sessions + reminder emails<br><br>Semi-guided | Six sessions over six weeks; accessed once a week + homework activities between sessions | Researcher monitored laboratory | PSS<br>SPCS<br>Trier Social Stress Test<br>Biological markers: a-amylase (saliva), heart rate + variability (ECG), skin conductance, systolic and diastolic blood pressure | Completers |
| Sethi et al 2010  | RCT<br>4 arms:<br>Intervention (9), CI 1 (10), CI 2 (9), NTC (10)<br>N=38<br>One HEI, Australia | Selective/indicated<br><br>Undergraduate psychology students<br>25 females, M age 19.47yrs<br>Low-to-moderate depression and/or anxiety (DASS-21)                        | <i>MoodGym</i> : internet-delivered CBT program<br><br>Semi-guided                                                                                                                                               | Five modules accessed during three sessions over three weeks                             | Researcher-monitored laboratory | DASS-21<br>K10<br>ATQ                                                                                                                                                      | ITT        |

---

|            |                                                                        |                                                                                                                  |                                                                                   |                                                       |              |                                                                                                    |           |
|------------|------------------------------------------------------------------------|------------------------------------------------------------------------------------------------------------------|-----------------------------------------------------------------------------------|-------------------------------------------------------|--------------|----------------------------------------------------------------------------------------------------|-----------|
| Taitz 2011 | RCT<br>2 arms: Intervention (86),<br>NTC (89)<br>N=175<br>One HEI, USA | Universal<br><br>Undergraduate students<br>150 female, M age 20.7yrs<br>≥18 yrs, no lucid dreaming<br>experience | Lucid dreaming<br>instruction taught via<br>the internet<br><br>Self-administered | Website accessed once a<br>week over four week period | Own location | BDI<br>LOC scale<br>Lucid Dream Recall +<br>Control questionnaire<br>Dream recall<br>questionnaire | Uncertain |
|------------|------------------------------------------------------------------------|------------------------------------------------------------------------------------------------------------------|-----------------------------------------------------------------------------------|-------------------------------------------------------|--------------|----------------------------------------------------------------------------------------------------|-----------|

---

Abbreviations: RCT – randomised controlled trial; AC – active control; CI – comparison intervention; WLC – wait-list control; NTC – no treatment control; ITT – intention-to-treat analysis; HEI – higher education institution; CBT – cognitive-behaviour therapy.

Measures: ACQ – Agoraphobia Cognitions Questionnaire; AHQ – Anxiety Hierarchy Questionnaire; AIRS – American International Relations Scale; APSR – Almost Perfect Scale–Revised; ASI – Anxiety Sensitivity Index; ATQ – Automatic Thoughts Questionnaire; BAI – Beck Anxiety Inventory; BDI – Beck Depression Inventory ; BFNE – Fear of Negative Evaluation scale; BSQ – Body Sensations Questionnaire; CAS – College Adjustment Scales; CBT-Lit – Cognitive Behavioural Therapy Literacy Scale; CCQ-M – Catastrophic Cognitions Questionnaire-Modified ; CES-D – Centre for Epidemiologic Studies–Depressed Mood Scale; CPQ-CC – Communication Patterns Questionnaire – Constructive Communication Subscale; CSI – Couples Satisfaction Index; CTS-2 – Revised Conflict Tactics Scale; DASS-21 – Depression, Anxiety and Stress Scale – 21 item version; EPSI – Exam Problem-Solving Inventory; FFMQ – Five Facet Mindfulness Questionnaire; FPSQ – Fear of Public Speaking Questionnaire; GSES – General Self-Efficacy Scale –exam related; HPLP-II – Health-Promoting Lifestyle Profile II; ISEL – Interpersonal Support Evaluation list; K-10 – Kessler Psychological Distress Scale; LOC scale – Internal/External Locus of Control Scale; MPS-FM-CM – Multidimensional Perfectionism Scale – Concern over Mistakes subscale ; MPS-HF – Multidimensional Perfectionism Scale; MS – Maladjustment scale; Online Social Support Scale (OSSS); PANAS – Positive and Negative Affect Schedule; PCI – Perfectionism Cognitions; PRQC – Perceived Relationship Quality Components Inventory; PSS – Perceived Stress Scale; SAD – Social Avoidance and Distress Scale; SPCS – Stress and Perception of Control Scale; SSPS – Self-Statements During Public Speaking; STAI-S – State Trait Anxiety Inventory – State; TAI – Test Anxiety Inventory; TDL – Treatment Depression Literacy.
