# Supplementary material for: Computer-Delivered and Web-Based Interventions to Improve Depression, Anxiety, and Psychological Well-Being of University Students: A Systematic Review and Meta-Analysis
Source: PubMed Central journal article supplement (PMC4051748; doi:10.2196/jmir.3142), 2014-05-16
Supplement: jmir_v16i5e130_app5.pdf [file jmir_v16i5e130_app5.pdf]

**Multimedia Appendix 4.** Non-skewed data which could not be incorporated into meta-analyses due to being sole study for specific outcomes of interest.

**Comparison: Website-based or computer-delivered intervention compared to inactive control**

| <i>Psychological distress</i> |                      | N  | Mean (SD)  |
|-------------------------------|----------------------|----|------------|
| Sethi 2010                    | Intervention         | 9  | 17.8 (5.9) |
|                               | No treatment control | 10 | 31.1 (3.3) |

---

**Comparison: Website-based or computer-delivered intervention compared to active control**

---

| <i>Stress</i> |                | N  | Mean (SD)    |
|---------------|----------------|----|--------------|
| Rose 2013     | Intervention   | 30 | 11.93 (3.85) |
|               | Active control | 29 | 14.48 (5.21) |

---

**Comparison: Website-based or computer-delivered intervention compared to comparison intervention**

---

| <i>Anxiety</i>                |              | N  | Mean (SD)   |
|-------------------------------|--------------|----|-------------|
| Sethi 2010                    | Intervention | 9  | 8.6 (4.1)   |
|                               | Comparison   | 10 | 8.0 (3.2)   |
| <i>Depression</i>             |              | N  | Mean (SD)   |
| Sethi 2010                    | Intervention | 9  | 15.7 (4.2)  |
|                               | Comparison   | 10 | 7.2 (3.1)   |
| <i>Psychological distress</i> |              | N  | Mean (SD)   |
| Sethi 2010                    | Intervention | 9  | 17.8 (5.9)  |
|                               | Comparison   | 10 | 13.8 (2.04) |
